# Supplementary material for: Intensive exercise ameliorates motor and cognitive symptoms in experimental Parkinson’s disease restoring striatal synaptic plasticity
Source: PubMed Central journal article supplement — Sci Adv. 2023 Jul 14;9(28):eadh1403. doi: 10.1126/sciadv.adh1403 (PMC10348672; doi:10.1126/sciadv.adh1403), 2023-07-14
Supplement: sciadv.adh1403_sm.pdf [file sciadv.adh1403_sm.pdf]

Supplementary Materials for

**Intensive exercise ameliorates motor and cognitive symptoms in experimental  
Parkinson's disease restoring striatal synaptic plasticity**

Gioia Marino *et al.*

Corresponding author: Paolo Calabresi, [paolo.calabresi@policlinicogemelli.it](mailto:paolo.calabresi@policlinicogemelli.it)

*Sci. Adv.* **9**, eadh1403 (2023)  
DOI: 10.1126/sciadv.adh1403

**This PDF file includes:**

Supplementary Text  
Figs. S1 and S2  
References

## Supplementary Text

### **Four-week exercise training does not perturb intrinsic membrane properties and spontaneous glutamatergic activity of striatal neurons**

To test whether treadmill exercise could alter membrane and firing responses of striatal neurons, we studied the intrinsic membrane properties of SPNs of all active and sedentary groups. Results indicate that intrastriatal  $\alpha$ -syn-PFFs injection did not exert effects on the membrane properties of striatal cells in sedentary groups and that exercise did not change either I-V relationship [two-way ANOVA: interaction group x treatment,  $F_{(18, 636)} = 1.55$ ,  $p > 0.05$ , group effect,  $F_{(3, 106)} = 0.49$ ,  $p > 0.05$ ,  $n = 19$  (PBS sed), 34 (PBS act), 21 (PFF sed), 36 (PFF act)] or the number of spikes in response to a step eliciting a maximum response [one-way ANOVA  $F_{(3, 69)} = 2.12$ ,  $p > 0.05$ ;  $n = 8$  (PBS sed), 33 (PBS act), 10 (PFF sed), 22 (PFF act)] (Fig. S1A-C).

Since  $\alpha$ -syn aggregates alter glutamate-dependent plasticity, we also examined spontaneous glutamatergic transmission in all the experimental groups (22, 40, 41). Measurement of amplitude and frequency of spontaneous excitatory post synaptic currents (sEPSCs), recorded from corticostriatal rat slices using the whole-cell patch-clamp technique, show that both frequency [one-way ANOVA  $F_{(3, 35)} = 0.65$ ,  $p > 0.05$ ,  $n = 9$  (PBS sed and act), 11 (PFF sed), 10 (PFF act)] and amplitude [one-way ANOVA  $F_{(3, 35)} = 2.11$ ,  $p > 0.05$ ,  $n = 9$  (PBS sed and act), 11 (PFF sed), 10 (PFF act)] were found unchanged in multiple comparisons among groups (Fig. S2).

Fig. S1.

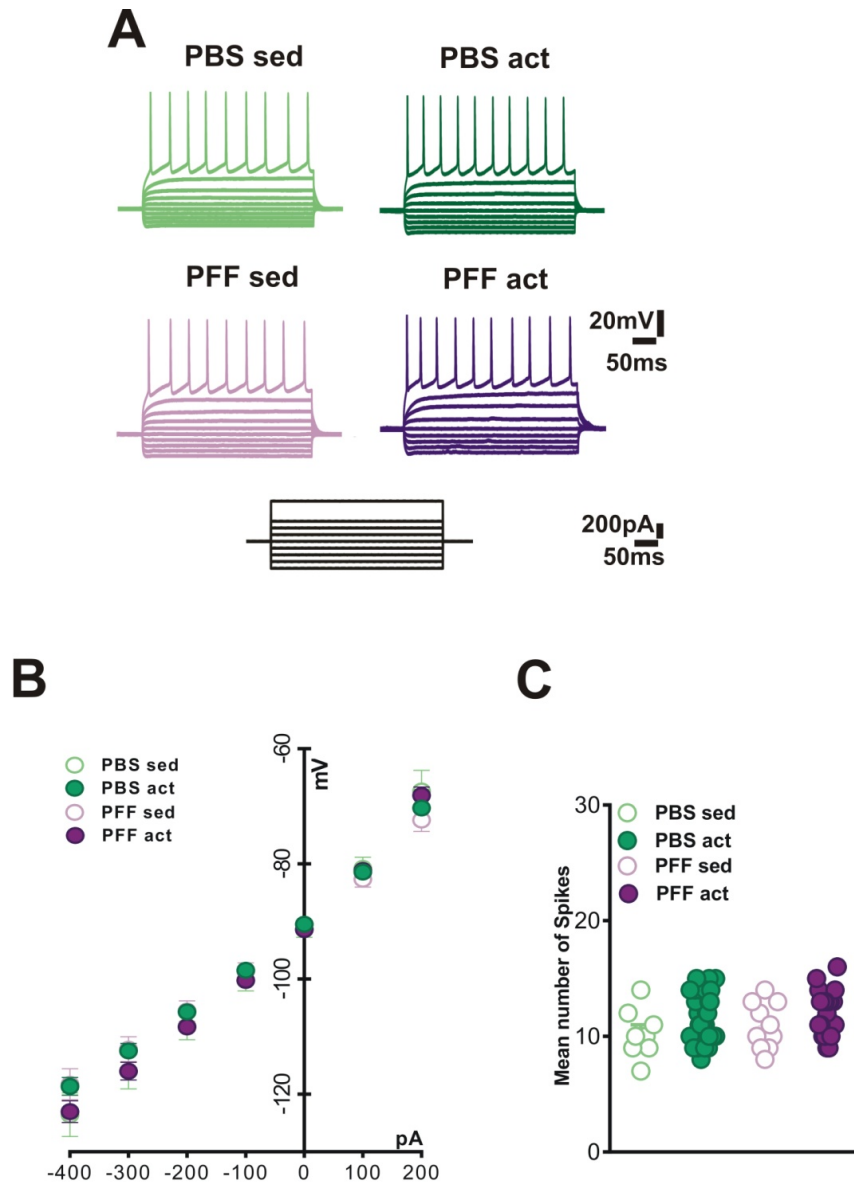

**Fig. S1. Intrinsic membrane properties of SPNs in PBS- and PFF-injected active and sedentary animals.** (A) Representative traces and (B) current-voltage (I-V) graphs obtained after applying hyperpolarizing and depolarizing steps of current (from -400 to +200pA) to SPNs, recorded in the dorsolateral striatum region from corticostriatal rat slices. (C) Scatter dot plots showing the mean number of spikes triggered by a step that generates a maximum response.

Fig. S2.

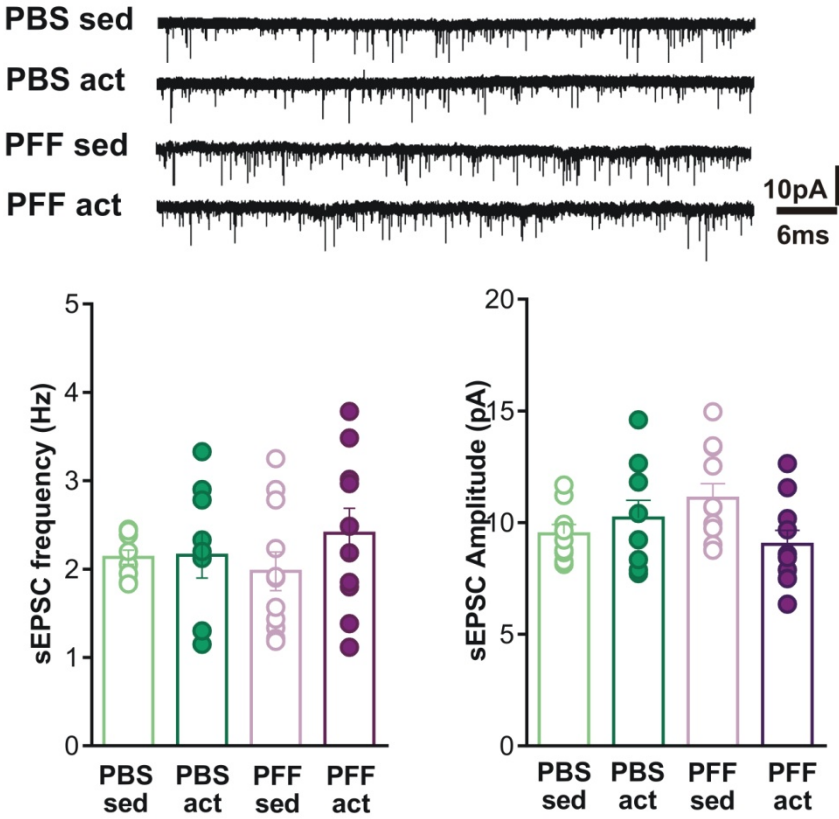

Fig. S2. Analysis of spontaneous glutamatergic activity in parkinsonian and healthy animals subjected or not to intensive exercise. Averaged values of frequency and amplitude of sEPSCs. The lower panel shows representative traces from patch-clamp recorded SPNs in corticostriatal slices from rats under different experimental conditions.

## REFERENCES AND NOTES

1. W. Poewe, K. Seppi, C. M. Tanner, G. M. Halliday, P. Brundin, J. Volkmann, A.-E. Schrag, A. E. Lang, Parkinson disease. *Nat. Rev. Dis. Primers* **3**, 17013 (2017).
2. M. Schenkman, C. G. Moore, W. M. Kohrt, D. A. Hall, A. Delitto, C. L. Comella, D. A. Josbeno, C. L. Christiansen, B. D. Berman, B. M. Kluger, E. L. Melanson, S. Jain, J. A. Robichaud, C. Poon, D. M. Corcos, Effect of high-intensity treadmill exercise on motor symptoms in patients with de novo parkinson disease: A phase 2 randomized clinical trial. *JAMA Neurol.* **75**, 219–226 (2018).
3. M. A. Sacheli, J. L. Neva, B. Lakhani, D. K. Murray, N. Vafai, E. Shahinfard, C. English, S. McCormick, K. Dinelle, N. Neilson, J. McKenzie, M. Schulzer, D. C. McKenzie, S. Appel-Cresswell, M. J. McKeown, L. A. Boyd, V. Sossi, A. J. Stoessl, Exercise increases caudate dopamine release and ventral striatal activation in Parkinson's disease. *Mov. Disord.* **34**, 1891–1900 (2019).
4. N. M. van der Kolk, N. M. de Vries, R. P. C. Kessels, H. Joosten, A. H. Zwinderman, B. Post, B. R. Bloem, Effectiveness of home-based and remotely supervised aerobic exercise in Parkinson's disease: A double-blind, randomised controlled trial. *Lancet Neurol.* **18**, 998–1008 (2019).
5. M. E. Johansson, I. G. M. Cameron, N. M. Van der Kolk, N. M. de Vries, E. Klimars, I. Toni, B. R. Bloem, R. C. Helmich, Aerobic exercise alters brain function and structure in parkinson's disease: A randomized controlled trial. *Ann. Neurol.* **91**, 203–216 (2022).
6. J.-H. Koo, Y.-C. Jang, D.-J. Hwang, H.-S. Um, N.-H. Lee, J.-H. Jung, J.-Y. Cho, Treadmill exercise produces neuroprotective effects in a murine model of Parkinson's disease by regulating the TLR2/MyD88/NF- $\kappa$ B signaling pathway. *Neuroscience* **356**, 102–113 (2017).
7. M.-S. Shin, T.-W. Kim, J.-M. Lee, E.-S. Ji, B.-V. Lim, Treadmill exercise alleviates nigrostriatal dopaminergic loss of neurons and fibers in rotenone-induced Parkinson rats. *J. Exerc. Rehabil.* **13**, 30–35 (2017).
8. M. G. Spillantini, M. L. Schmidt, V.-M. Lee, J. Q. Trojanowski, R. Jakes, M. Goedert,  $\alpha$ -Synuclein in Lewy bodies. *Nature* **388**, 839–840 (1997).

9. G. Marino, P. Calabresi, V. Ghiglieri, Alpha-synuclein and cortico-striatal plasticity in animal models of Parkinson disease. *Handb. Clin. Neurol.* **184**, 153–166 (2022).
10. D. Dutta, R. K. Paidi, S. Raha, A. Roy, S. Chandra, K. Pahan, Treadmill exercise reduces  $\alpha$ -synuclein spreading via PPAR $\alpha$ . *Cell Rep.* **40**, 111058 (2022).
11. G. M. Petzinger, B. E. Fisher, S. McEwen, J. A. Beeler, J. P. Walsh, M. W. Jakowec, Exercise-enhanced neuroplasticity targeting motor and cognitive circuitry in Parkinson's disease. *Lancet Neurol.* **12**, 716–726 (2013).
12. A. Tozzi, M. Sciaccaluga, V. Loffredo, A. Megaro, A. Ledonne, A. Cardinale, M. Federici, L. Bellingacci, S. Paciotti, E. Ferrari, A. La Rocca, A. Martini, N. B. Mercuri, F. Gardoni, B. Picconi, V. Ghiglieri, E. De Leonibus, P. Calabresi, Dopamine-dependent early synaptic and motor dysfunctions induced by  $\alpha$ -synuclein in the nigrostriatal circuit. *Brain* **144**, 3477–3491 (2021).
13. P. Calabresi, B. Picconi, A. Tozzi, V. Ghiglieri, M. Di Filippo, Direct and indirect pathways of basal ganglia: A critical reappraisal. *Nat. Neurosci.* **17**, 1022–1030 (2014).
14. N. Giordano, A. Iemolo, M. Mancini, F. Cacace, M. De Risi, E. C. Latagliata, V. Ghiglieri, G. C. Bellenchi, S. Puglisi-Allegra, P. Calabresi, B. Picconi, E. De Leonibus, Motor learning and metaplasticity in striatal neurons: Relevance for Parkinson's disease. *Brain* **141**, 505–520 (2018).
15. V. Ghiglieri, D. Mineo, A. Vannelli, F. Cacace, M. Mancini, V. Pendolino, F. Napolitano, A. di Maio, M. Mellone, J. Stanic, E. Tronci, C. Fidalgo, R. Stancampiano, M. Carta, P. Calabresi, F. Gardoni, A. Usiello, B. Picconi, Modulation of serotonergic transmission by eltoprazine in L-DOPA-induced dyskinesia: Behavioral, molecular, and synaptic mechanisms. *Neurobiol. Dis.* **86**, 140–153 (2016).
16. B. Picconi, D. Centonze, K. Hakansson, G. Bernardi, P. Greengard, G. Fisone, M. A. Cenci, P. Calabresi, Loss of bidirectional striatal synaptic plasticity in L-DOPA-induced dyskinesia. *Nat. Neurosci.* **6**, 501–506 (2003).
17. D. Besusso, M. Geibel, D. Kramer, T. Schneider, V. Pendolino, B. Picconi, P. Calabresi, D. M. Bannerman, L. Minichiello, BDNF-TrkB signaling in striatopallidal neurons controls inhibition of locomotor behavior. *Nat. Commun.* **4**, 2031 (2013).

18. Y. Yuan, J. Sun, M. Zhao, J. Hu, X. Wang, G. Du, N.-H. Chen, Overexpression of  $\alpha$ -synuclein down-regulates BDNF expression. *Cell. Mol. Neurobiol.* **30**, 939–946 (2010).
19. S. S. Kang, Z. Zhang, X. Liu, F. P. Manfredsson, M. J. Benskey, X. Cao, J. Xu, Y. E. Sun, K. Ye, TrkB neurotrophic activities are blocked by  $\alpha$ -synuclein, triggering dopaminergic cell death in Parkinson's disease. *Proc. Natl. Acad. Sci. U.S.A.* **114**, 10773–10778 (2017).
20. D. Centonze, B. Picconi, P. Gubellini, G. Bernardi, P. Calabresi, Dopaminergic control of synaptic plasticity in the dorsal striatum. *Eur. J. Neurosci.* **13**, 1071–1077 (2001).
21. V. Durante, A. de Iure, V. Loffredo, N. Vaikath, M. De Risi, S. Paciotti, A. Quiroga-Varela, D. Chiasserini, M. Mellone, P. Mazzocchetti, V. Calabrese, F. Campanelli, A. Mechelli, M. Di Filippo, V. Ghiglieri, B. Picconi, O. M. El-Agnaf, E. De Leonibus, F. Gardoni, A. Tozzi, P. Calabresi, Alpha-synuclein targets GluN2A NMDA receptor subunit causing striatal synaptic dysfunction and visuospatial memory alteration. *Brain* **142**, 1365–1385 (2019).
22. G. Natale, A. Pignataro, G. Marino, F. Campanelli, V. Calabrese, A. Cardinale, S. Pelucchi, E. Marcello, F. Gardoni, M. T. Viscomi, B. Picconi, M. Ammassari-Teule, P. Calabresi, V. Ghiglieri, Transcranial magnetic stimulation exerts "Rejuvenation" effects on corticostriatal synapses after partial dopamine depletion. *Mov. Disord.* **36**, 2254–2263 (2021).
23. A. Aniszewska, J. Bergström, M. Ingelsson, S. Ekmark-Lewén, Modeling Parkinson's disease-related symptoms in alpha-synuclein overexpressing mice. *Brain Behav.* **12**, e2628 (2022).
24. D. Aarsland, L. Batzu, G. M. Halliday, G. J. Geurtsen, C. Ballard, K. Ray Chaudhuri, D. Weintraub, Parkinson disease-associated cognitive impairment. *Nat. Rev. Dis. Primers.* **7**, 47 (2021).
25. M. Xu, J. Zhu, X.-D. Liu, M.-Y. Luo, N.-J. Xu, Roles of physical exercise in neurodegeneration: Reversal of epigenetic clock. *Transl. Neurodegener.* **10**, 30 (2021).
26. Y.-S. Feng, S.-D. Yang, Z.-X. Tan, M.-M. Wang, Y. Xing, F. Dong, F. Zhang, The benefits and mechanisms of exercise training for Parkinson's disease. *Life Sci.* **245**, 117345 (2020).
27. Y.-H. Wang, H.-H. Zhou, Q. Luo, S. Cui, The effect of physical exercise on circulating brain-derived neurotrophic factor in healthy subjects: A meta-analysis of randomized controlled trials. *Brain Behav.* **12**, e2544 (2022).



28. S.-Y. Lin, K. Wu, E. S. Levine, H. T. J. Mount, P.-C. Suen, I. B. Black, BDNF acutely increases tyrosine phosphorylation of the NMDA receptor subunit 2B in cortical and hippocampal postsynaptic densities. *Mol. Brain Res.* **55**, 20–27 (1998).
29. A. Volianskis, G. France, M. S. Jensen, Z. A. Bortolotto, D. E. Jane, G. L. Collingridge, Long-term potentiation and the role of N-methyl-D-aspartate receptors. *Brain Res.* **1621**, 5–16 (2015).
30. X. Zhou, Q. Ding, Z. Chen, H. Yun, H. Wang, Involvement of the GluN2A and GluN2B subunits in synaptic and extrasynaptic N-methyl-D-aspartate receptor function and neuronal excitotoxicity. *J. Biol. Chem.* **288**, 24151–24159 (2013).
31. P. Calabresi, P. Gubellini, D. Centonze, B. Picconi, G. Bernardi, K. Chergui, P. Svenningsson, A. A. Fienberg, P. Greengard, Dopamine and cAMP-regulated phosphoprotein 32 kDa controls both striatal long-term depression and long-term potentiation, opposing forms of synaptic plasticity. *J. Neurosci.* **20**, 8443–8451 (2000).
32. Y. Smith, R. M. Villalba, D. V. Raju, Striatal spine plasticity in Parkinson's disease: Pathological or not? *Parkinsonism Relat. Disord.* **15 Suppl 3**, S156–S161 (2009).
33. E. Ferrari, D. Scheggia, E. Zianni, M. Italia, M. Brumana, L. Palazzolo, C. Parravicini, A. Pilotto, A. Padovani, E. Marcello, I. Eberini, P. Calabresi, M. Diluca, F. Gardoni, Rabphilin-3A as a novel target to reverse  $\alpha$ -synuclein-induced synaptic loss in Parkinson's disease. *Pharmacol. Res.* **183**, 106375 (2022).
34. E. De Leonibus, F. Manago, F. Giordani, F. Petrosino, S. Lopez, A. Oliverio, M. Amalric, A. Mele, Metabotropic glutamate receptors 5 blockade reverses spatial memory deficits in a mouse model of Parkinson's disease. *Neuropsychopharmacology* **34**, 729–738 (2009).
35. E. De Leonibus, T. Pascucci, S. Lopez, A. Oliverio, M. Amalric, A. Mele, Spatial deficits in a mouse model of Parkinson disease. *Psychopharmacology (Berl)* **194**, 517–525 (2007).
36. C. Rodo, F. Sargolini, E. Save, Processing of spatial and non-spatial information in rats with lesions of the medial and lateral entorhinal cortex: Environmental complexity matters. *Behav. Brain Res.* **320**, 200–209 (2017).
37. E. Guatteo, F. R. Rizzo, M. Federici, A. Cordella, A. Ledonne, L. Latini, A. Nobili, M. T. Viscomi, F. Biamonte, K. K. Landrock, A. Martini, D. Aversa, C. Schepisi, M. D'Amelio, N. Berretta, N. B.

Mercuri, Functional alterations of the dopaminergic and glutamatergic systems in spontaneous  $\alpha$ -synuclein overexpressing rats. *Exp. Neurol.* **287**, 21–33 (2017).

38. P. Calabresi, A. Pisani, N. B. Mercuri, G. Bernardi, Long-term potentiation in the striatum is unmasked by removing the voltage-dependent magnesium block of NMDA receptor channels. *Eur. J. Neurosci.* **4**, 929–935 (1992).
39. D. Mineo, F. Cacace, M. Mancini, A. Vannelli, F. Campanelli, G. Natale, G. Marino, A. Cardinale, P. Calabresi, B. Picconi, V. Ghiglieri, Dopamine drives binge-like consumption of a palatable food in experimental Parkinsonism. *Mov. Disord.* **34**, 821–831 (2019).
40. V. Bagetta, C. Sgobio, V. Pendolino, G. Del Papa, A. Tozzi, V. Ghiglieri, C. Giampà, E. Zianni, F. Gardoni, P. Calabresi, B. Picconi, Rebalance of striatal NMDA/AMPA receptor ratio underlies the reduced emergence of dyskinesia during D2-like dopamine agonist treatment in experimental Parkinson's disease. *J. Neurosci.* **32**, 17921–17931 (2012).
41. P. Calabresi, N. B. Mercuri, G. Sancesario, G. Bernardi, Electrophysiology of dopamine-denervated striatal neurons. Implications for Parkinson's disease. *Brain* **116 (Pt 2)**, 433–452 (1993).
